# Supplementary material
Source: PubMed Central journal article supplement (PMC10731920)
Supplement: BLOOD_BLD-2023-020142-mmc2.pdf [file BLOOD_BLD-2023-020142-mmc2.pdf]

## Supplemental Materials and Methods:

**Cell lines and culture.** ABC-DLBCL cell lines (TMD8, OCI-Ly10, SUDHL2, and OCI-Ly3), mantle cell lymphoma cell lines (JeKo-1, Granta-519, Rec-1, Z-138 and Mino) were engineered to express the bacterial tetracycline repressor as described previously<sup>1</sup>. All cultures were routinely tested for Mycoplasma contamination. All lymphoma cell lines were purchased from the ATCC and used for previous studies (31, 32) and authenticated by STR profiling. Ibrutinib-resistant TMD8, OCI-Ly10, Rec-1, and JeKo-1 cells were generated by *in vitro* culture of their parental cell lines for prolonged periods of time with progressively increasing the concentrations of ibrutinib. Cell lines and their drug-resistant clones grew in RPMI-1640 medium (Life Technologies) with 10% FBS (ThermoFisher), 1mmol/L sodium pyruvate (Cytiva HyClone), and 1% penicillin/streptomycin (Life Technologies).

**Measurement of mitochondrial membrane potential ( $\Delta\Psi$ ) and mitochondrial ROS.** Cells were incubated with JC-1 (10  $\mu\text{g}/\text{mL}$ ) for 10 min or mitoSOX (5  $\mu\text{M}$ ) for 20 min in phenol red free media at 37°C, followed by three washes with PBS. Subsequently samples were analyzed using an Attune flow cytometer.

### Primary MCL samples

All four primary cells were gifts from Dr. Vu N. Ngo's laboratory in Beckman Research Institute of City of Hope. Primary cells were cultured in RPMI-1640 medium (Life Technologies) with 10% FBS (ThermoFisher), 1mmol/L sodium pyruvate (Cytiva HyClone), and 1% penicillin/streptomycin (Life Technologies).

### Doxycycline-inducible system and retroviral transduction

Doxycycline-inducible cells lines can express the bacterial tetracycline repressor, engineered as described previously<sup>2</sup>. Doxycycline (20 ng/ml) was used for inducing the expression of genes of interest. 293T cells were transfected with a mixture of DNA/shRNA constructs, the mutant ecotropic envelop-expressing plasmid pHIT/EA6  $\times$  3\*, and gag-pol-expressing plasmid using PEI Transfection Reagents. The retroviral supernatants were harvested for infecting doxycycline-inducible lymphoma cells with 8  $\mu\text{g}/\text{ml}$  polybrene by centrifugation at 2,500 r.p.m. for 1.5 hours. The infected cells were selected with puromycin (1  $\mu\text{g}/\text{ml}$ ) for 6 days, and GFP positive cells were analyzed with flow cytometry. shCtrl group refers to cells expressing a control shRNA<sup>2,3</sup>.

### Dual-luminescence-based reporter gene assay

The Dual-luminescence-based reporter gene assay was performed in triplicate at room temperature. HEK293T cells were co-transfected with CMX- $\beta$ -gala (15 ng), pGL3 basic (100 ng), pGL3-PDP1 promoter region constructs ((pGL3-F1 (100 ng), pGL3-F2 (100 ng), pGL3-F3 (100 ng)) or pGL3-EGR1 promoter region constructs ((pGL3-F1 (100 ng), pGL3-F2 (100 ng), pGL3-F3 (100 ng), pGL3-F4 (100 ng)), and 200 ng PBMN vector or retro CMV vector, PBMN-OE-EGR1 or retro CMV-TCF4, respectively, using PEI. CMX- $\beta$ -galactosidase expression vector (15 ng) was transfected for normalization of transfection efficiency. After 48 h, cells were harvested and lysed in lysis buffer (0.1 M potassium phosphate, pH 7.8, 0.2% Triton X-100, 0.5 mM DTT and 1 mg/mL bovine serum (BSA) Fraction V (A-3059; Sigma Chemical). Luminescence signal intensity was measured followed by Chemiluminescent Reporter Gene Assay System and Luciferase Assay System, respectively. Firefly luciferase activity from the pGL3 basic reporter was normalized with  $\beta$ -galactosidase activity.

### XF cell mito stress analysis

The mitochondrial respiratory capacity was determined using XF Cell Mito Stress Test Kit (Agilent Technologies).  $2.5 \times 10^5$  cells per well were seeded into the Cell-Tak-Coated 96-well XF Cell Culture

Microplate and a round bottom 96 well plate. To normalize OCR per viable cell, cells in a round-bottom 96 well plate were counted using DAPI on a flow cytometer. Cells in an XF Cell Culture Microplate were incubated in analysis media separately containing 10mM glucose, or 2 mM sodium pyruvate or 2.5 mM L-glutamine. The cells were incubated in a CO<sub>2</sub>-free incubator at 37°C for 1 hour prior to assay. The oxygen consumption rate (OCR) was measured by XF<sup>96</sup> extracellular flux analyzer (Agilent Technologies) with sequential injection of oligomycin A (1 μM), FCCP (1 μM), and rotenone/antimycin A (0.5 μM). ATP production was calculated following the manufacturer's guidelines as: ATP = (Last rate before Oligomycin injection) - (Minimum rate after Oligomycin injection).

### **Pyruvate dehydrogenase enzyme activity assay**

The Pyruvate dehydrogenase (PDH) Enzyme Activity Microplate Assay Kit (Abcom, ab109902) was used to measure the PDH activity, following the manufacturer's instructions. Briefly, indicated PBS with 1/9 volume detergent was added into each 1.5 ml tube with cells collected from a 10 cm dish. The tubes were kept on ice for 10 min after gentle mixing. Tubes were centrifuged at 1,000g for 10 min and the supernatant was transferred into a new tube. Protein concentration was measured with BCA and 200 μl protein lysis (0.5 – 5mg/ml) per well was loaded into a 96-well assay plate and kept at room temperature for 3 hours. Assay buffer was mixed with 100 × coupler, 100 × dye, 20 × reagent mix and 20 × sample buffer. Liquid in the assay plate wells was removed and washed twice with 1 × stabilizer. 200 μl assay buffer was added into each well, and absorbance was measured at 450 nm every 30 s for 30 cycles with a microplate reader. The slope of the kinetic curve was calculated to indicate PDH activity.

### **Confocal imaging**

The TMD8 and OCI-Ly10 cells were fixed with 4% paraformaldehyde in culture media for 15 min at 37°C and permeabilized with 0.2% Triton X-100 for 10 min at room temperature. The nonspecific binding was blocked by incubation with 4% BSA in PBS for 60 min, and cells were subsequently stained with MitoTracker® Deep Red FM (10 nM) for 20 mins. The slides were gently washed in PBS three times (5min/each time). After being washed three time in PBS and air-dried, the coverslips were mounted in ProLong Gold anti-fade reagent with DAPI (Invitrogen). Fluorescence was examined Nikon A1RS Confocal Microscope equipped with a 60-x objective lens with laser excitation at 405nm and 638 nm. Images were analyzed and quantification with the ImageJ 1.5.3 software.

### **RNA sequencing**

Total RNA was extracted using RNeasy plus mini kit (Qiagen) according to the manufacturer's protocol. RNA sequencing (RNA-seq) libraries were prepared by using the Illumina TruSeq stranded mRNA LT sample preparation kit (Illumina). Gene set enrichment analysis (GSEA) was performed by GSEA software (V2.0; <http://software.broadinstitute.org/gsea/index.jsp>). RNA-seq data discussed in this article have been deposited in the National Center for Biotechnology Information's Gene Expression Omnibus (GEO) and are accessible through GEO Series accession number: GSE223150.

### **Variant calling**

Reads from RNA-sequencing were aligned to hg19 using STAR (v2.5.2b). Duplicated reads were removed with picard (v1.141). Germline SNP was called using the following tools in the Genome Analysis Toolkit (GATK v3): SPLITNCIGARREADS, HaploTypeCaller and VariantFiltration with default parameters except for the following:

- For HaploTypeCaller, dontUseSoftChippedBases was specified, -stand\_call\_conf and -stand\_emit\_conf were both set to 20.0.
- For VariantFiltration, window was set to 35, and only variants having variant confidence greater than 2 and strand bias less than 30 were kept.

### **Chromatin immunoprecipitation (ChIP)**

Briefly,  $60 \times 10^6$  cells were fixed with 1% formaldehyde for 10 min at room temperature. The cross-linking reaction was stopped by addition of  $1 \times$  glycine solution for 5 min. Cells were washed twice with ice-cold PBS. Cytosols were removed using ChIP cell lysis buffer. Nuclear pellets were resuspended in micrococcal nuclease buffer (MNase), treated with 112.5 unit of MNase for 12 min at 37°C and stopped by adding EDTA to the final concentration of 0.5M. Nuclear pellets were then washed once with MNase buffer, lysed with nuclear lysis buffer for 20 min at 4°C, and sonicated for a total of 5 min (5s on, 20s off, 20% amplitude, qsonica #Q500-110) at 4°C. 2% of fragmented DNA was kept as input. The remaining DNA fragments were recovered using anti-TCF4 (1 µg for 60 million cells) or anti-EGR1 (1 µg for 60 million cells), or normal rabbit anti-IgG. DNA fragments were washed and reverse crosslinked as previously described<sup>3</sup>. Recovered DNA fragments were purified using QIAGEN PCR purification kit and diluted in 500 µL of water. For each real-time PCR reaction, 3 µL was used with specific primers. The SensiFAST™ SYBR® Hi-ROX Kit (Bioline BIO-92020) was used for qPCR.

### **ATAC-seq regions of open chromatin peak calling, gene associations, and motif analysis**

SRR42, SRR43 and SRR46 ATAC-seq data sets can be found via the SRA/NCBI BioProject (<https://www.ncbi.nlm.nih.gov/Traces/study/?acc=PRJNA750745>), accession PRJNA750745. TCF4 ChIP-seq data can be found via the Staudt Lab ([https://lymphochip.nih.gov/local/Staudt\\_Ibrutinib\\_resistance\\_BCD/](https://lymphochip.nih.gov/local/Staudt_Ibrutinib_resistance_BCD/)). Fastq files from PRJNA750745 were processed by fastp<sup>4</sup> and aligned to the human genome hg19 using Hisat2<sup>5</sup> with default parameters. Open chromatin regions were called using MACS2<sup>6</sup> (parameters: -p 0.05). BedGraph files were converted into bigwig files for IGV visualization by bedGraphToBigWig function<sup>7</sup>. Peaks were annotated by R package ChIPseeker<sup>8</sup>. TxDb.Hsapiens.UCSC.hg19.knownGene and org.Hs.eg.db were used as annotation database for information such as entrez ID, ensemble, symbol, gene name and transcript ID. The sequence of peak near to gene EGR1 was extracted for transcription factor footprints analysis with ChIPpeakAnno<sup>9</sup>. At last, MEME-Tomtom<sup>10,11</sup> pipeline with default parameters was applied to search for the motifs enriched in the certain sequence. HUMAN-HOCOMOCO Human (v11 CORE) was used as motif database.

**Mice.** Male and female NOD.Cg-Prkdcscid Il2rgtm1Wjl/SzJ (NSG) breeder pairs were purchased from The Jackson Laboratory (Bar Harbor, ME, USA) and bred under specific pathogen-free conditions in sterile ventilated racks in the animal care facility at the University of Wisconsin-Madison and the National Cancer Institute, NIH. Both male and female mice were used between 8-16 weeks of age. The study was approved by the Animal Care and Use Committee of the University of Wisconsin-Madison (M005915) and the National Cancer Institute, NIH.

### **Xenograft studies**

TMD8 IBR #3, OCI-Ly10 IBR#9, OCI-Ly10 IBR#10 shCtrl or OCI-Ly10 IBR#10 shEGR1 cells were inoculated subcutaneously into the flank of male and female NSG mice. When tumors reached approximately 150 mm<sup>3</sup>, mice were randomized and administered vehicle, ibrutinib, metformin or the combination of both at the indicated doses in the figure or main text. Body weight and tumor diameter were measured twice a week, and tumor volume was determined by calculating the volume of an ellipsoid using the formula  $\text{length} \times \text{width}^2 \times 0.5$ . All values were expressed as mean  $\pm$  standard error of the mean (SEM). When mice became moribund or when tumor size exceeded 20 mm in any direction, mice were euthanized as required by institutional protocols.

### **Drug formulation**

For *in vivo* studies, ibrutinib was formulated in 5% DMSO, 30% PEG400, 5% Tween 80, and 60% water. IM156 was formulated in 2.5% DMSO, 15% PEG400, 2.5% Tweens 80, and 80% water. Metformin was formulated in 5.0 % DMSO, and 95% water. Drugs were used immediately after suspension.

### **Trypan blue staining**

Cell viability was measured with an automatic cell counter according to the manufacturer's instruction. Cells were suspended and mixed with equal volume of 0.4% trypan blue in PBS. Ten microliters of the cell suspension were loaded onto TC20 system (Bio-Rad) counting slides, and the number of viable cells was quantified on a TC20 automated cell counter (Bio-Rad).

### **RT-qPCR**

Total RNA was extracted using RNeasy Plus Mini Kit (Qiagen) according to the manufacturer's protocol and quantified with a Nanodrop lite spectrophotometer (Thermo Scientific). For each sample, 1.5 $\mu$ g RNA was reverse transcribed with a first-strand cDNA synthesis kit (Invitrogen). qPCR was performed with SensiFast SYBR Hi-Rox Kit (Bioline: BIO-92005) using an ABI Stepone Plus Real-Time PCR System. Samples were run at 2 min at 95°C, followed by 40 cycles at 95°C for 5s and 60°C for 30s. Data were normalized to  $\beta$ -Actin mRNA expression.

### **Lactate production assay**

Lactate production assays are performed by following the Lactate-Glo™ Assay 's Manual (Promega). Briefly, 20,000 cells were resuspended in 25  $\mu$ l PBS and plated in 96-well plates. 12.5  $\mu$ l inactivate solution (0.6 N HCl) was added, mixed by shaking the plate for 5 minutes, then 12.5  $\mu$ l neutralization solution was added followed by shaking 30-60 seconds. The Lactate Detection Reagent was added to 96-well plates as described in the manual and incubated 1 hour at room temperature. Then the luminescence signaling were recorded with an EnSpire plate reader (Perkin Elmer).

### **Western blot analysis**

Cell pellets were lysed in RIPA buffer (10mM Tris-HCl, pH8 140 mM NaCl, 1mM EDTA, 0.5mM EGTA, 1% Triton X-100, 0.1% Sodium Deoxycholate, 0.1%SDS) supplemented with protease / phosphatase inhibitor for 15 mins on ice. Lysates were cleared by centrifugation at 15,000g at 4°C for 15 min and protein concentrations were determined by BCA protein assay (Pierce). 25ug of lysates were denatured with SDS sample buffer and 2.5% beta-mercaptethanol at 95°C for 5 mins. Samples were subjected to electrophoresis through a RunBlue SDS Gel 4-20% (CBS Scientific) and then immobilized on the polyvinylidene difluoride membrane (IPFL00010, Millipore). The Odyssey Imaging System (CRB LI-COR Biosciences) was used for densitometry.

### **IHC staining and quantification**

The tumor tissues from NSG mice were fixed and embedded with paraffin after those mice were sacrificed. Immunohistochemical staining of samples were performed by the Experimental Animal Pathology Laboratory at the Carbone Cancer Center (Madison, WI). The primary antibody of rabbit anti-Ki-67 and cleaved Caspase 3 were used. Three tumor tissues were collected from each group to stain, and four images from each staining were taken. Protein expression was quantified using Image J 1.5.3 software.

| REAGENT or RESOURCE                                                       | SOURCE                              | IDENTIFIER                               |
|---------------------------------------------------------------------------|-------------------------------------|------------------------------------------|
| <b>Antibodies</b>                                                         |                                     |                                          |
| Rabbit monoclonal anti-EGR1 (44D5)                                        | Cell signaling                      | 4154S                                    |
| Rabbit monoclonal anti-BTK (D3H5)                                         | Cell signaling                      | 8547                                     |
| Rabbit monoclonal anti-PDP1 (D8Y6L)                                       | Cell signaling                      | 6557S                                    |
| Rabbit monoclonal anti-beta-Actin                                         | Cell signaling                      | 4967S                                    |
| Rabbit polyclonal anti-Cleaved Caspase-3 (Asp175) (5A1E)                  | Cell signaling                      | 9664                                     |
| Rabbit monoclonal anti-human Ki-67 (D2H10)                                | Cell signaling                      | 9027                                     |
| Anti-rabbit IgG, HRP-linked Antibody                                      | Cell signaling                      | 7074                                     |
| Anti-mouse IgG, HRP-linked Antibody                                       | Cell signaling                      | 7076                                     |
| Rabbit polyclonal anti-Pyruvate Dehydrogenase E1-alpha subunit (p Ser293) | Novus Biologicals™                  | NB11093479T                              |
| Mouse monoclonal anti-PDH-E1α Antibody (D-6)                              | Santa cruz                          | sc-377092                                |
| Mouse monoclonal anti-EGR1(B6)                                            | Santa Cruz                          | sc-515830                                |
| Mouse monoclonal antibody LDH-A(E9)                                       | Santa cruz                          | sc-137243                                |
| Mouse monoclonal anti-alpha tubulin (TU-02)                               | Santa cruz                          | sc-8035                                  |
| Mouse monoclonal anti-FLA38 M2 antibody                                   | Sigma-Aldrich                       | F1804                                    |
| Rabbit polyclonal anti-PDK1 antibody                                      | Proteintech                         | 18262-1-AP                               |
| Rabbit polyclonal anti-PDP2 antibody                                      | Thermo fisher                       | PA5-100680                               |
| Rabbit monoclonal anti-TCF-4 antibody [NCI-R159-6]                        | Abcam                               | ab217668                                 |
| Mouse monoclonal anti-Hsp90 antibody                                      | Abcam                               | ab1429                                   |
| PE mouse anti-human CD19 Clone 4G7                                        | R&D biotechne                       | MAB4867R                                 |
| PE mouse IgG1 k Isotype Control                                           | BD biosciences                      | 555749                                   |
| APC mouse anti-human CD38                                                 | BD biosciences                      | 555462                                   |
| APC mouse IgG1 k Isotype Control                                          | BD biosciences                      | 555751                                   |
| APC mouse anti-human CD45 Clone 2D1                                       | BD biosciences                      | 368514                                   |
| PE mouse anti-human CD2                                                   | eBioscience                         | 12-0029-41                               |
| PE mouse anti-human CD3 antibody                                          | BD biosciences                      | 300308                                   |
| FITC mouse anti-human CD34 Clone 4H11                                     | eBioscience                         | 11-0349-41                               |
| FITC mouse anti-human CD20 clone LT20                                     | Miltenyi Biotec                     | 130-113-373                              |
| Mouse polyclonal anti-Vinculin Polyclonal                                 | Bethyl Laboratories                 | A302-534A                                |
| <b>REAGENT or RESOURCE</b>                                                |                                     |                                          |
| <b>Chemicals and Critical Commercial assays</b>                           |                                     |                                          |
| Ibrutinib                                                                 | Selkchem                            | S2680                                    |
| IM156                                                                     | Selkchem                            | S2604                                    |
| Metformin hydrochloride                                                   | Sigma-Aldrich                       | PHR1084                                  |
| Phenformin hydrochloride                                                  | Sigma-Aldrich                       | P7045                                    |
| Mithramycin A                                                             | Cayman Chemical                     | 11434                                    |
| Devimistat                                                                | Targetmol                           | CAS 95809-78-2                           |
| JC-1 Dye                                                                  | Invitrogen™                         | T3168                                    |
| MitoSOX™ Red Mitochondrial Superoxide Indicator                           | Thermo Fisher Scientific            | M36008                                   |
| MitoTracker™ Deep Red                                                     | Thermo Fisher Scientific            | M22426                                   |
| Galacto-Star™ β-Galactosidase Reporter Gene Assay System                  | Thermo Fisher Scientific            | T1012                                    |
| SuperScript™ IV First-Strand Synthesis System                             | Thermo Fisher Scientific            | 18091050                                 |
| SuperSignal™ West Femto Maximum Sensitivity Substrate                     | Thermo Fisher Scientific            | 34096                                    |
| Pierce™ BCA Protein Assay Kit                                             | Thermo Fisher Scientific            | 23225                                    |
| Trizol for RNA extraction                                                 | Thermo Fisher Scientific            | 15596018                                 |
| Luciferase Assay System                                                   | Promega                             | E1500                                    |
| CellTiter-Glo(R) 2.0 Assay                                                | Promega                             | G9242                                    |
| Lactate-Glo™ Assay                                                        | Promega                             | J5021                                    |
| Pyruvate dehydrogenase (PDH) Enzyme Activity Microplate Assay Kit         | Abcom                               | ab109902                                 |
| ChromaFlash High-Sensitivity ChIP Kit (24 reactions)                      | EpigenTek                           | P-2027-24                                |
| APC BrDu flow kit                                                         | BD pharmingen                       | 552598                                   |
| APC Annexin V                                                             | BD pharmingen                       | 550474                                   |
| PI flow dye (BD)                                                          | BD pharmingen                       | 556463                                   |
| Doxycycline hyclate                                                       | SIGMA-ALDRICH                       | D9891                                    |
| RPMI-1640 medium (1x) L-glutamine                                         | hyclone                             | SH30096.LS                               |
| DMEM/High glucose with L-glutamine, sodium pyruvate                       | hyclone                             | SH30243.FS                               |
| FBS                                                                       | Atlanta                             | quote #50319                             |
| Seahorse XF Cell Mito Stress Test Kit                                     | Agilent                             | 103015                                   |
| XF RPMI Medium pH7.4                                                      | Agilent                             | 103576                                   |
| XF Calibrant, pH 7.4                                                      | Agilent                             | 100840                                   |
| Corning® Cell-Tak™ Cell and Tissue Adhesive                               | Corning                             | 354240                                   |
| pen/strep solution                                                        | lonza                               | 17-602E                                  |
| Corning® glutagro™                                                        | Corning                             | 25-015-CI                                |
| MEM Non-Essential Amino Acid Solution (100X)                              | Lonza                               | 13-114E                                  |
| Sodium Pyruvate Solution                                                  | GE Healthcare Life Sciences         | SH30239.01                               |
| Trypan Blue Solution (w/v) in PBS                                         | orning                              | 25-900-CI                                |
| Protease inhibitor cocktail                                               | sigma-aldrich                       | P8340                                    |
| PMSF Protease Inhibitor                                                   | Thermo Scientific™                  | 36978                                    |
| NUPAGE™ LDS Sample Buffer (4X)                                            | Thermo Scientific™                  | NP0007                                   |
| D-Luciferin, Sodium Salt                                                  | Gold Biotechnology                  | LUCNA                                    |
| QIAquick PCR Purification kit                                             | QIAGEN                              | 28106                                    |
| RNeasy Plus Mini Kit                                                      | QIAGEN                              | 74136                                    |
| SensiFast SYBR Hi-Rox Kit                                                 | Bioline                             | BIO-92005                                |
| TruSeq Stranded mRNA Library Preparation Kit Set B                        | illumina                            | RS-122-2102                              |
| TruSeq DNA LT Sample Prep Kit                                             | illumina                            | FC-121-2001                              |
| Triton X-100                                                              | EMD MILLIPORE                       | 94101L                                   |
| pierce 16% formaldehyde (w/v), methanol-free                              | pierce                              | 28908                                    |
| PureLink™ RNase A                                                         | Invitrogen                          | 12091021                                 |
| <b>Experimental models - Mouse</b>                                        |                                     |                                          |
| NSG mice                                                                  | Jackson Laboratory                  | 005557 - NOD.Cg-Prkdcscid Il2rgtm1Wj/SzJ |
| <b>Software and Algorithms</b>                                            |                                     |                                          |
| ImageJ 142 software                                                       | NIH                                 | https://imagej.nih.gov/ij/index.html     |
| GraphPad Prism 9.0                                                        | Graphpad                            | www.graphpad.com                         |
| FlowJo Software vX 10.0.7v2                                               | FLOWJO, LLC                         |                                          |
| GSEA v3.0                                                                 | Broad Institute                     |                                          |
| Integrative Genomic Viewer v2.3.91(145)                                   | Broad Institute                     |                                          |
| <b>Recombinant DNA</b>                                                    |                                     |                                          |
| pHIT/EA6x3                                                                | Ngo, et al. Nature 2006             | DOI: 10.1038/nature04687                 |
| pHIT60                                                                    | Ngo, et al. Nature 2006             | DOI: 10.1038/nature04687                 |
| pRetro/CMV/TO/P-EGR1                                                      | Shuichi, et al. Mol Cancer Res 2021 | DOI: 10.1158/1541-7786.MCR-21-0267       |
| pRSMX-PG-shEGR1#8                                                         | Shuichi, et al. Mol Cancer Res 2021 | DOI: 10.1158/1541-7786.MCR-21-0267       |
| pRSMX-PG-shEGR1#9                                                         | Shuichi, et al. Mol Cancer Res 2021 | DOI: 10.1158/1541-7786.MCR-21-0267       |
| pRSMX-PG-shRNA control                                                    | Shaffer, et al. Nature 2008         | DOI: 10.1038/nature07064                 |
| pLKO.5 control sh                                                         | SHC202                              | Sigma                                    |
| pLKO.5-shTCF4 (CDS) #1                                                    | TRCN0000274162                      | Sigma                                    |
| pLKO.5-shTCF4 (3UTR) #2                                                   | TRCN0000274213                      | Sigma                                    |
| pGL3-F1 (94928900-94929460)                                               | This paper                          |                                          |
| pGL3-F2 (94928900-94929180)                                               | This paper                          |                                          |
| pGL3-F3 (94929181-94929460)                                               | This paper                          |                                          |
| <b>Oligo Name</b>                                                         |                                     |                                          |
| human EGR1 mRNA F                                                         | Sequence                            | Application                              |
| human EGR1 mRNA R                                                         | TGACCCGACAGATCTTTCCT                | qRT-PCR (mRNA)                           |
| human beta-Actin mRNA F                                                   | TGGCTTGGCTATGCTCACTA                | qRT-PCR (mRNA)                           |
| human beta-Actin mRNA R                                                   | AACTGTGACCGTGAAGGTG                 | qRT-PCR (mRNA)                           |
| human PCNA mRNA F                                                         | AGAGAAGTGGGGTGGCTTT                 | qRT-PCR (mRNA)                           |
| human PCNA mRNA R                                                         | AGGCACTCAAGCACCTCATC                | qRT-PCR (mRNA)                           |
| human 94928900-PDP1-Fragmentation 1-Kpn1-Forward                          | GCCAAGGTATCCGGCTTATC                | qRT-PCR (mRNA)                           |
|                                                                           | CGGGGTACC CCTTCCACTCGGTGGGG         | PDP1 promoter DNA                        |

|                                              |                                                                                                                              |                       |
|----------------------------------------------|------------------------------------------------------------------------------------------------------------------------------|-----------------------|
| human 94929180 PDP1-Fragment 1 -Xho1-Reverse | CGGCTCGAG CACTCTGCTCCCTACCGTG                                                                                                | PDP1 promoter DNA     |
| human 94929181 PDP1-Fragment 2 -Kpn1-Forward | CGGGGTACC GCGAGGCCGGGGGTGAGG                                                                                                 | PDP1 promoter DNA     |
| human 94929460 PDP1-Fragment 2 -Xho1-Reverse | CGGCTCGAG CGCCCGCGCCGACCTGG                                                                                                  | PDP1 promoter DNA     |
| EGR1 promoter region #1F                     | GGTGAACCTGGTCTACTATAA                                                                                                        |                       |
| EGR1 promoter region #1R                     | CCTCTGGGTTCAAGCTATT                                                                                                          |                       |
| EGR1 promoter region #2F                     | CCTCACCAAGGACCATATC                                                                                                          |                       |
| EGR1 promoter region #2R                     | CGAAAGCGTTCCTAGTC                                                                                                            |                       |
| EGR1 promoter region #3F                     | AAGGACGCTCACTGCTATAC                                                                                                         |                       |
| EGR1 promoter region #3R                     | TCTATGGCACGGTCTCTTC                                                                                                          |                       |
| EGR1 promoter region #6F                     | CAGCAACAGCAGCAGCA                                                                                                            |                       |
| EGR1 promoter region #6R                     | TCCGCTGAGGGTTGAA                                                                                                             |                       |
| DNLZ-F                                       | AGGAAAGCCGAGGATGACTT                                                                                                         |                       |
| DNLZ-R                                       | TCATGGTGGTTGAGGGAGA                                                                                                          |                       |
| Arid3-F                                      | CTCAGGGTCTCTCCGCTAA                                                                                                          |                       |
| Arid3-R                                      | GACCAAGTCTCTCCCTCTTAC                                                                                                        |                       |
| Chr.5-F                                      | CCTGGATATGCTCCCTGAT                                                                                                          |                       |
| Chr.5-R                                      | CCTGGCCTGACTTTGCTTT                                                                                                          |                       |
| EGR1 Promoter-Set1-Forward-Xho1              | CCG CTCGAG GAAAGACCCGTGCCATAGA                                                                                               |                       |
| EGR1 Promoter-Set1-Reverse-Hind III          | CCC AAGCTT TATCGGGCCACTCCAAATAG                                                                                              |                       |
| EGR1 Promoter-Set2-Forward-Xho1              | CCG CTCGAG CTCACCAAGGACCATATCT                                                                                               |                       |
| EGR1 Promoter-Set2-Reverse-Hind III          | CCC AAGCTT TCGCTGGGAAATTGAGGATAG                                                                                             |                       |
| EGR1 Promoter-Set3-Forward-Xho1              | CCG CTCGAG CTCCTGGTGAGAACAAATCA                                                                                              |                       |
| EGR1 Promoter-Set3-Reverse-Hind III          | CCC AAGCTT AAATAAGTGTGCCCAATAAG                                                                                              |                       |
| EGR1 Promoter-Set4-Forward-Xho1              | CCG CTCGAG ATTTGAGTGGCCGATAG                                                                                                 |                       |
| EGR1 Promoter-Set4-Reverse-Hind III          | CCC AAGCTT GCCTCTATTTGAAGGTCTGG                                                                                              |                       |
| PDP1 Iso5-BamH1-Forward                      | CGC GGATCC GCCACC ATG CCA GCA CCA CCA CTCAAc                                                                                 |                       |
| PDP1-Not1-Reverse                            | ATTT GCGGCGCG CTATTCTGGTTTTGATA                                                                                              |                       |
| PDP1-qPCR-Forward primer                     | TTCTGGAGCCACTGCTTGTGTG                                                                                                       | qRT-PCR (mRNA)        |
| PDP1-qPCR-Reverse primer                     | ACAGCGTACTGCTGACCATGA                                                                                                        | qRT-PCR (mRNA)        |
| EGR1-ATG-HindIII-F                           | CCCAAGCTTATGGCCGCGCCCAAGGCCGA                                                                                                | EGR1-full length cDNA |
| EGR1-STOP-Xho1-R                             | CGGCTCGAGTTAGCAAAATTTCAATTGTCC                                                                                               | EGR1-full length cDNA |
| shEGR1#9 duplex                              | AGCTAAAAAAGAGGCTCTATTGGCCAACAATTTCTTGAATTTGGCCAAATAGACCTTCGG<br>GATCCCGAAGGTCTATTGGCCAACAATTTCAAGAGAATTTGGCCAATAGACCTTCTTTTT | shRNA                 |
| sgEGR1 #9 duplex                             | AGCTAAAAAAGTATGATGCTGTGACAATAATCTCTTGAATTTGTCACAGCATCATCAGG<br>GATCCCGTATGATGCTGTGACAATAATTTCAAGAGATTATTGTCACAGCATCATCCTTTTT | shRNA                 |

| Cell lines | originally from the American Type Culture Collection (ATCC), engineered and used by previous studies, authenticated by gene expression profiling |                           |
|------------|--------------------------------------------------------------------------------------------------------------------------------------------------|---------------------------|
| TMD8       | Ngo, et al. Nature 2006                                                                                                                          | DOI: 10.1038/nature04687  |
| OCI-Ly10   | Ngo, et al. Nature 2006                                                                                                                          | DOI: 10.1038/nature04687  |
| SUDHL2     | Ngo, et al. Nature 2006                                                                                                                          | DOI: 10.1038/nature04687  |
| OCI-Ly3    | Ngo, et al. Nature 2006                                                                                                                          | DOI: 10.1038/nature04687  |
| JEKO-1     | Li, et al. Oncogene 2016                                                                                                                         | DOI: 10.1038/ncr.2016.155 |
| Granta519  | Li, et al. Oncogene 2016                                                                                                                         | DOI: 10.1038/ncr.2016.155 |
| Rec-1      | Li, et al. Oncogene 2016                                                                                                                         | DOI: 10.1038/ncr.2016.155 |
| Z138       | Li, et al. Oncogene 2016                                                                                                                         | DOI: 10.1038/ncr.2016.155 |
| Rec-1      | Li, et al. Oncogene 2016                                                                                                                         | DOI: 10.1038/ncr.2016.155 |
| Mino       | Li, et al. Oncogene 2016                                                                                                                         | DOI: 10.1038/ncr.2016.155 |

## Supplemental References

1. Ngo VN, Davis RE, Lamy L, et al. A loss-of-function RNA interference screen for molecular targets in cancer. *Nature*. 2006;441(7089):106-110.
2. Ngo VN, Young RM, Schmitz R, et al. Oncogenically active MYD88 mutations in human lymphoma. *Nature*. 2011;470(7332):115-119.
3. Lu L, Zhu F, Zhang M, et al. Gene regulation and suppression of type I interferon signaling by STAT3 in diffuse large B cell lymphoma. *Proc Natl Acad Sci U S A*. 2018;115(3):E498-E505.
4. Chen S, Zhou Y, Chen Y, Gu J. fastp: an ultra-fast all-in-one FASTQ preprocessor. *Bioinformatics*. 2018;34(17):i884-i890.
5. Kim D, Paggi JM, Park C, Bennett C, Salzberg SL. Graph-based genome alignment and genotyping with HISAT2 and HISAT-genotype. *Nat Biotechnol*. 2019;37(8):907-915.
6. Zhang Y, Liu T, Meyer CA, et al. Model-based analysis of ChIP-Seq (MACS). *Genome Biol*. 2008;9(9):R137.
7. Kent WJ, Zweig AS, Barber G, Hinrichs AS, Karolchik D. BigWig and BigBed: enabling browsing of large distributed datasets. *Bioinformatics*. 2010;26(17):2204-2207.
8. Yu G, Wang LG, He QY. ChIPseeker: an R/Bioconductor package for ChIP peak annotation, comparison and visualization. *Bioinformatics*. 2015;31(14):2382-2383.
9. Zhu LJ, Gazin C, Lawson ND, et al. ChIPpeakAnno: a Bioconductor package to annotate ChIP-seq and ChIP-chip data. *BMC Bioinformatics*. 2010;11:237.
10. Bailey TL, Elkan C. Fitting a mixture model by expectation maximization to discover motifs in biopolymers. *Proc Int Conf Intell Syst Mol Biol*. 1994;2:28-36.
11. Gupta S, Stamatoyannopoulos JA, Bailey TL, Noble WS. Quantifying similarity between motifs. *Genome Biol*. 2007;8(2):R24.



**Supplemental Figures and Figure Legends:**

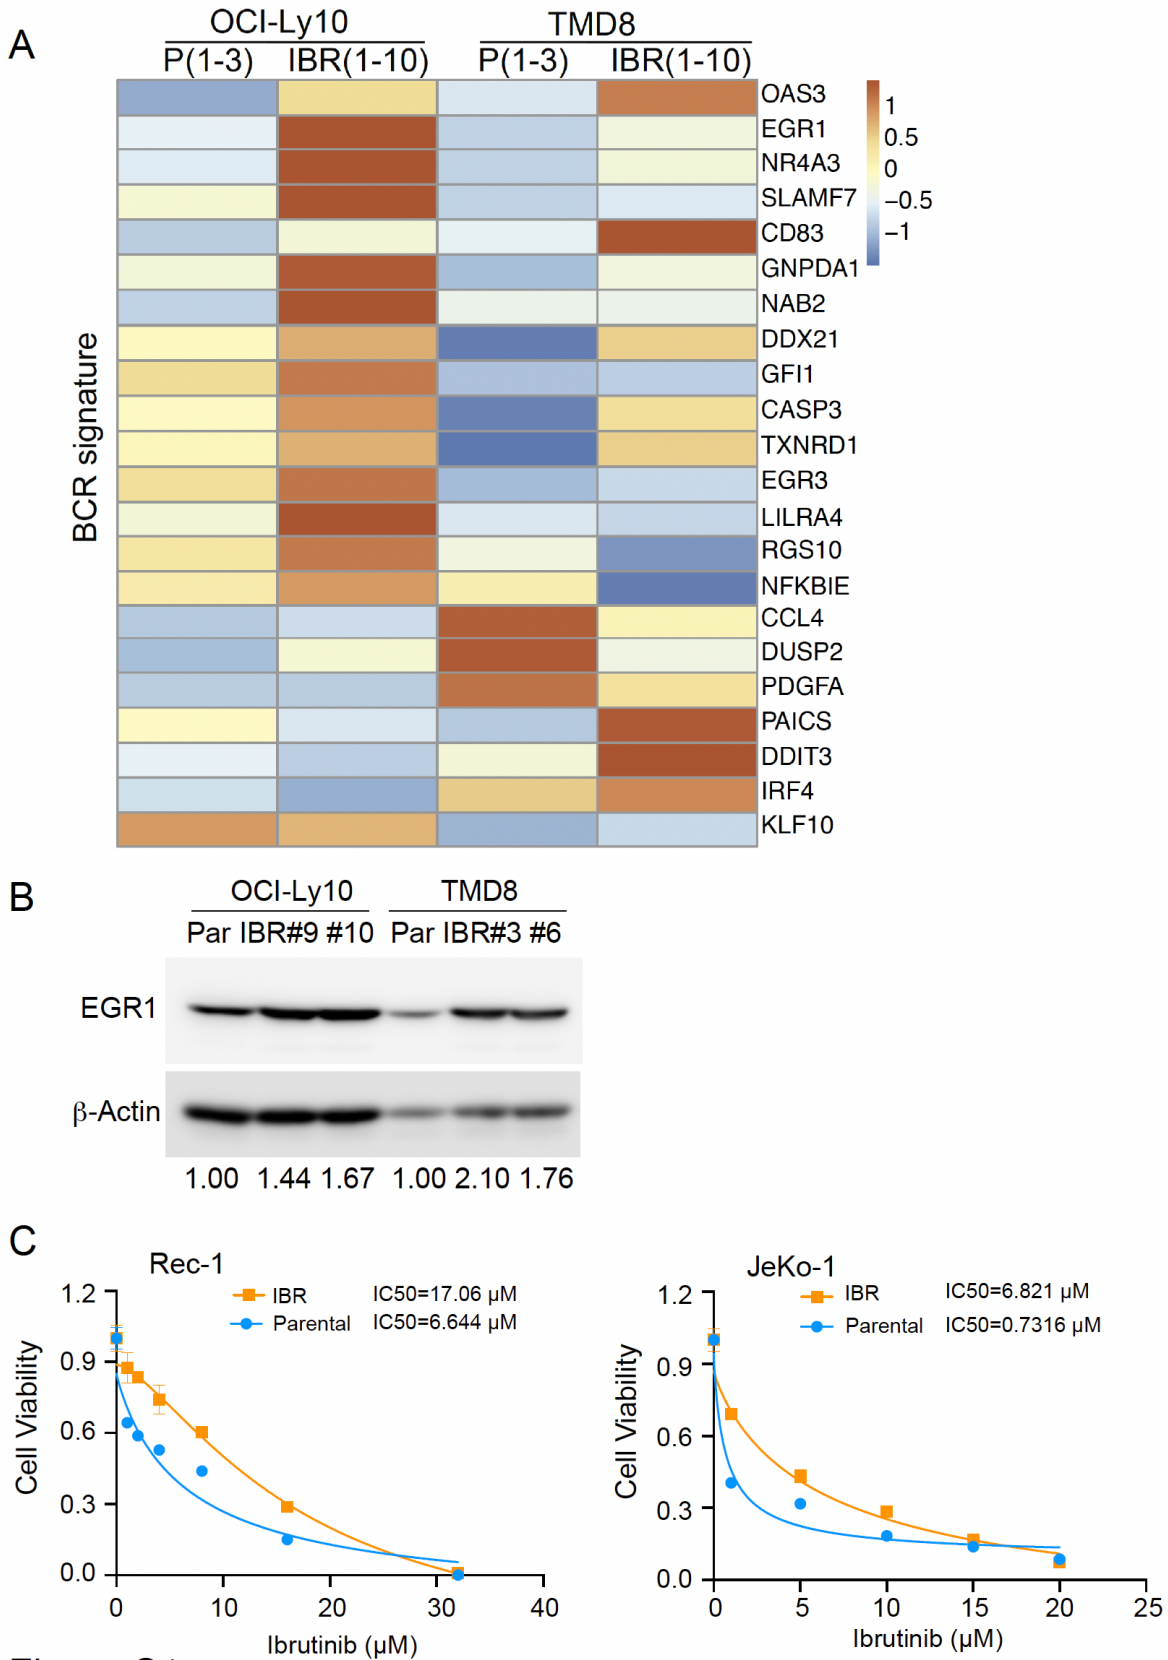

**Figure S1**



**Supplemental Figure 1. Increased expression of BCR signaling pathway genes in ibrutinib-resistant cells.** (A) Heat maps show differential expression of BCR signature genes between OCI-ly10 and TMD8 parental (P) (n=3) and IBR clones (n=10). (B) Immunoblot analysis of EGR1 expression in IBR clones versus parental cells in the ibrutinib-free culture for a month.  $\beta$ -Actin served as a loading control. (C) CellTiter-Glo™ Luminescent Cell Viability Assay after 3-day ibrutinib treatment in Rec-1 and JeKo-1 parental and IBR cells. IC50 was calculated by GraphPad Prism (9.0) using a 4-parameter nonlinear regression model.

A

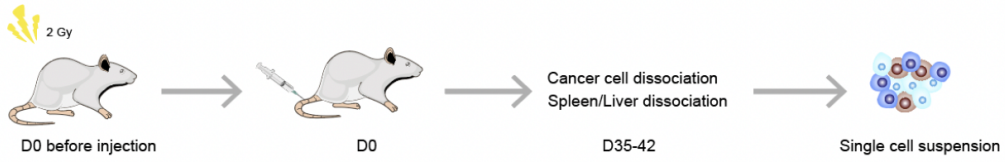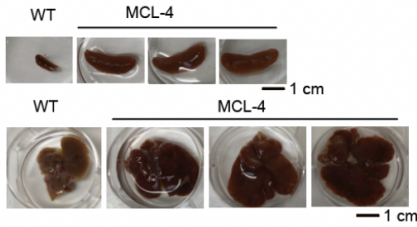

B

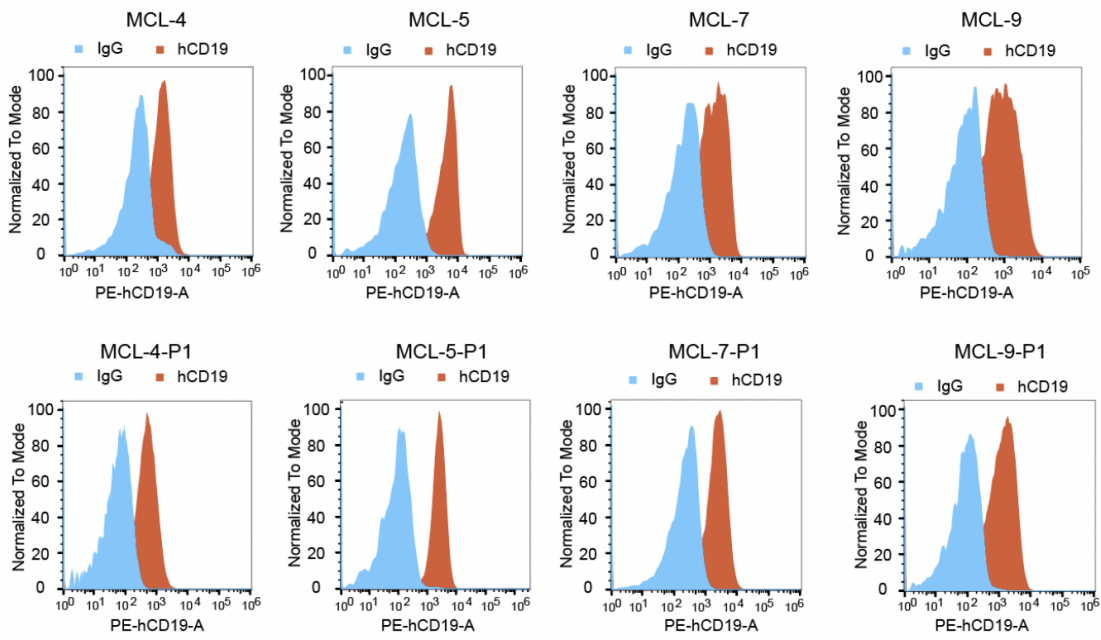

C

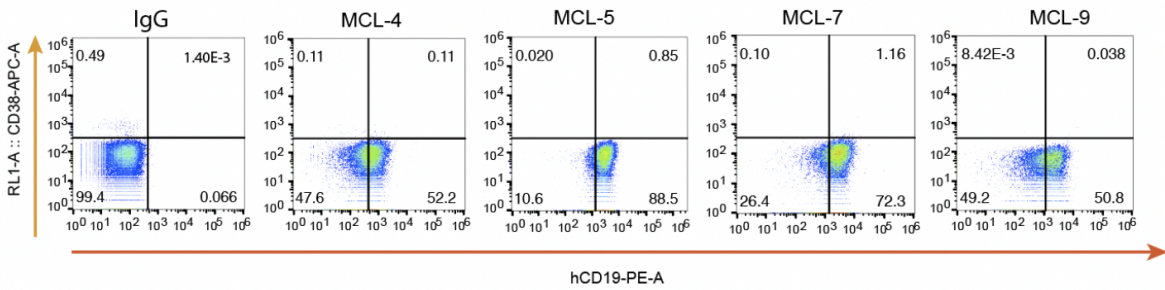

D

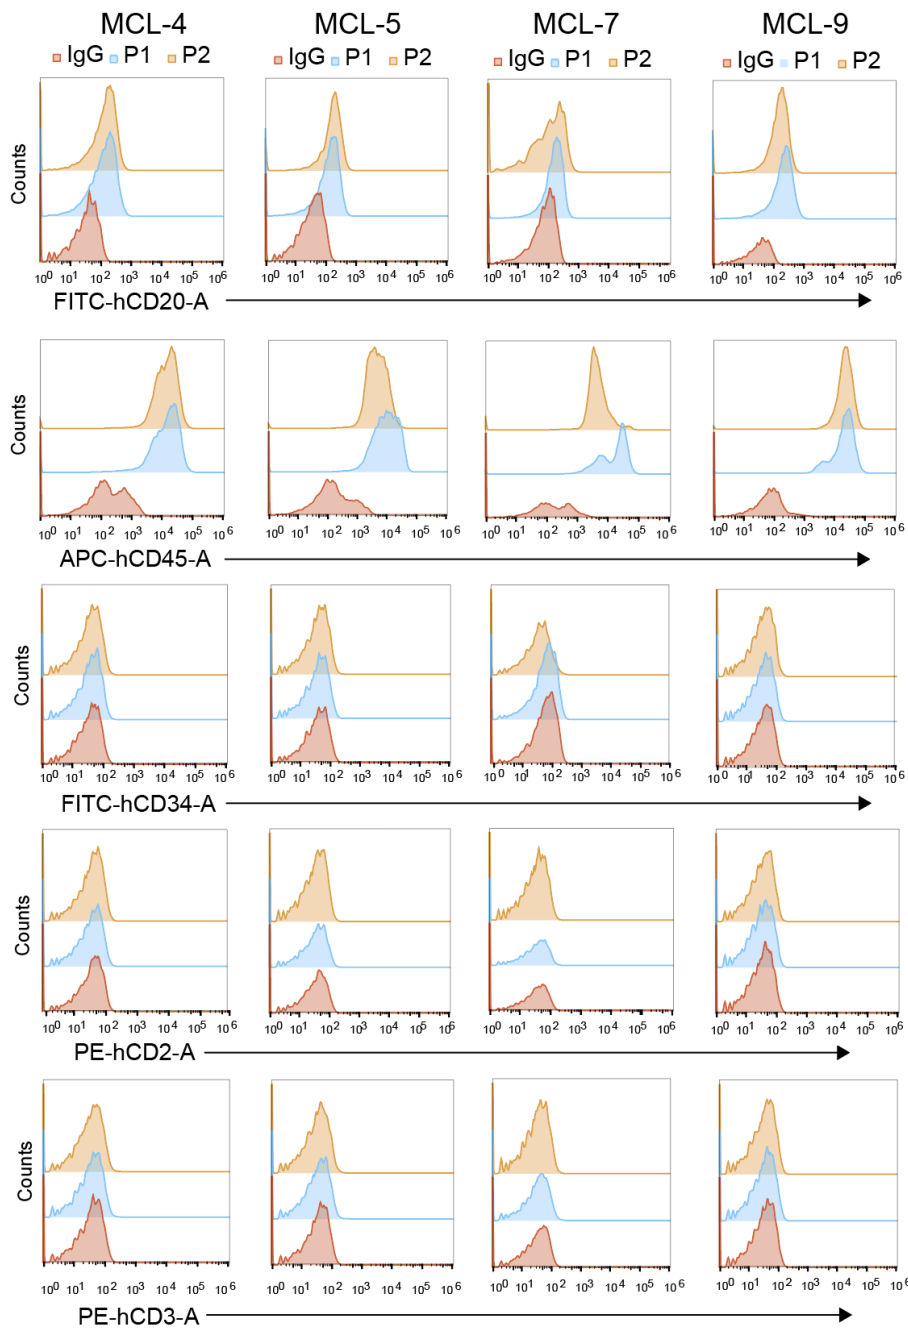

E

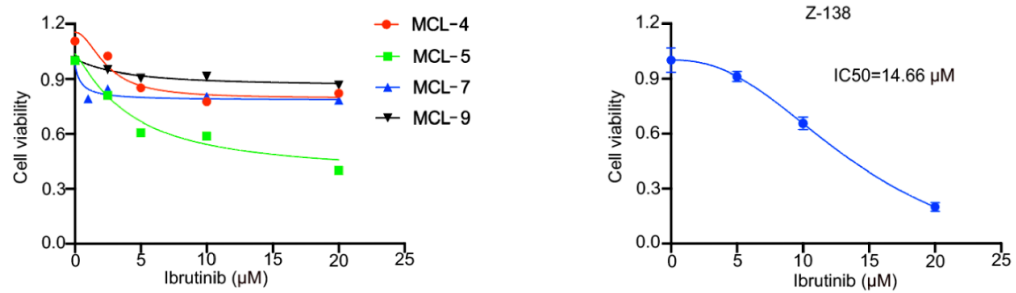

Figure S2

**Supplemental Figure 2. No phenotypical changes of primary MCL cells after expansion in NSG mice.** (A) Schematic illustration of expansion of MCL patient derived cells in NSG mice (top).  $2 \times 10^6$  MCL cells were resuspended in 0.1 ml PBS and injected into the tail-vein of sublethally irradiated (2 Gy) NSG mice. After 35-42 days, spleens and livers of mice were collected to obtain single-cell suspensions of tumor. Representative images of spleen and liver from wild type or PDX mice were shown (bottom). (B) Flow cytometry was used to determine human (h) CD19 expression in original (P0) MCL samples and MCL samples with one passage (P1) in NSG mice. (C) hD19 expression and hCD38 expression were determined by flow cytometry in four P1 MCL samples. (D) The expression of human CD20, human CD45, human CD34, human CD2 and human CD3 were determined by flow cytometry in four P1 MCL samples and MCL samples with two passages (P2) in NSG mice. (E) Trypan blue cell viability assay after 3-day ibrutinib treatment in MCL-4, MCL-5, MCL-7, MCL-9 cells (Left panel) and Z-138 (Right panel), P0 MCL samples were used in this assay. IC50 was calculated by GraphPad Prism (9.0) using a 4-parameter nonlinear regression model.

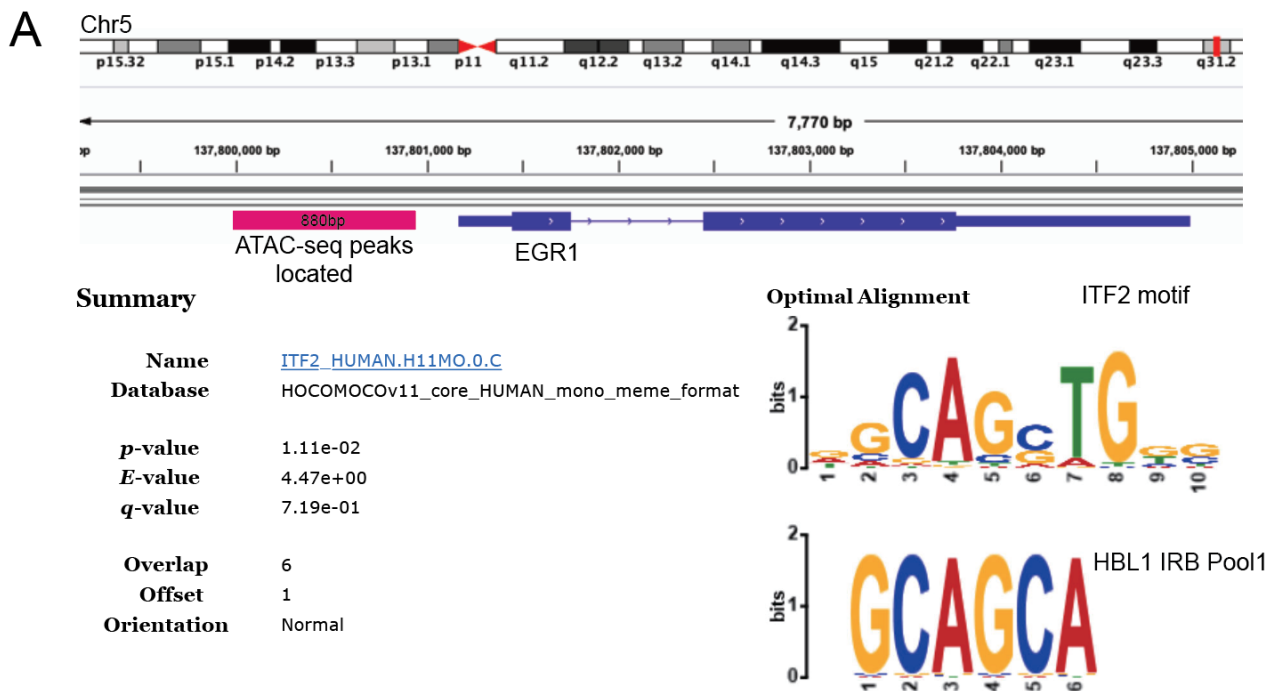

Figure S3

**Supplemental Figure 3. Motif enrichment analysis of ATAC-seq in ibrutinib-resistant cells.** (A) Motif enrichment analysis of ATAC-seq identified a high frequency of TCF4 motif (ITF2) on the EGR1 promoter region in ibrutinib-resistant cells.

A

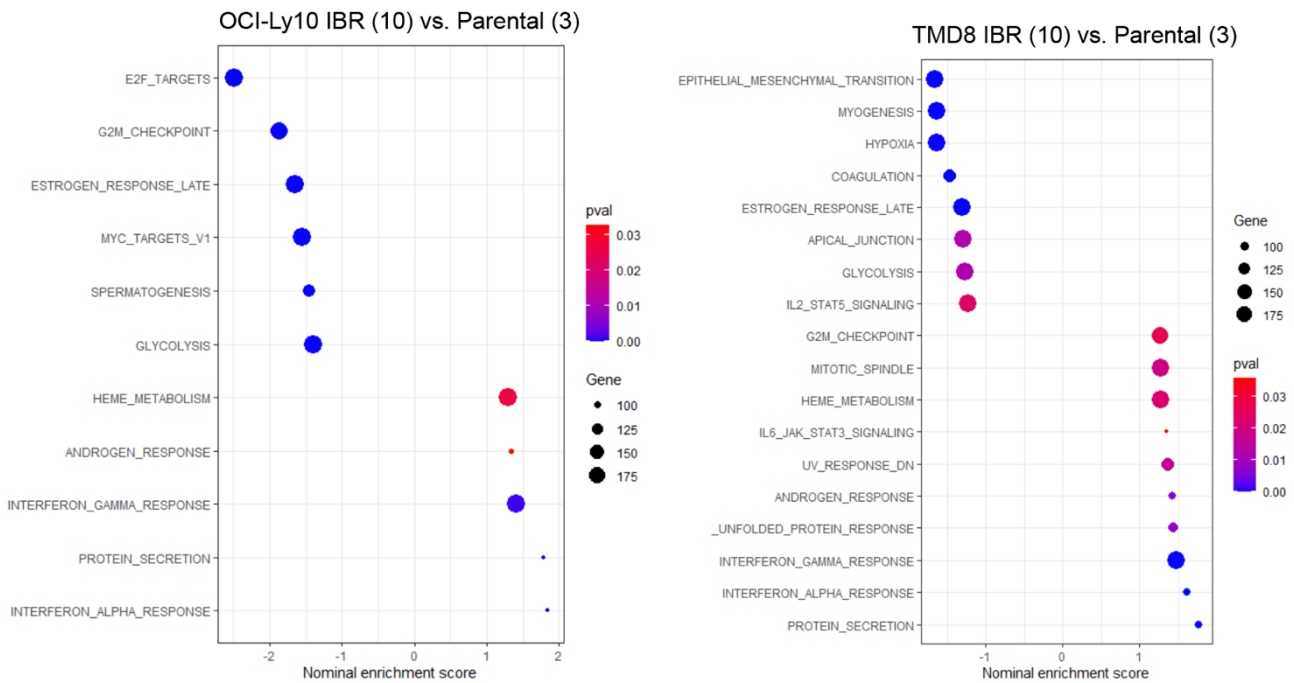

B

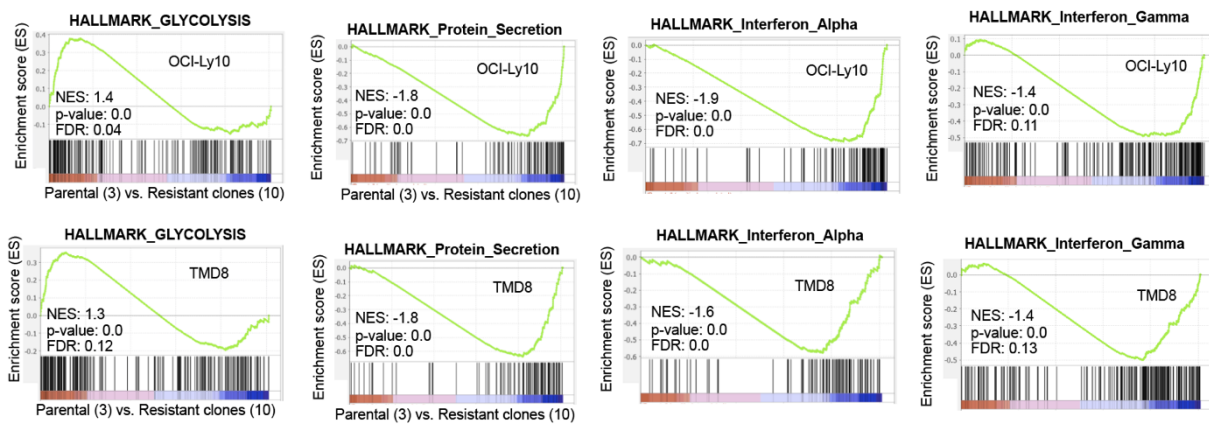

Figure S4

**Supplemental Figure 4. Pathway enrichment analysis of RNA-seq data in ibrutinib-resistant cells.** (A) A rank order list of the most enriched pathways in OCI-Ly10 and TMD8 IBR clones (n=10) versus parental cells (P) (n=3). (B) Gene set enrichment analysis of glycolysis signature genes and protein secretion and interferon signaling signature genes in TMD8 and OCI-Ly10 parental and resistant cells. NES = normalized enrichment score. FDR = false discovery rate.

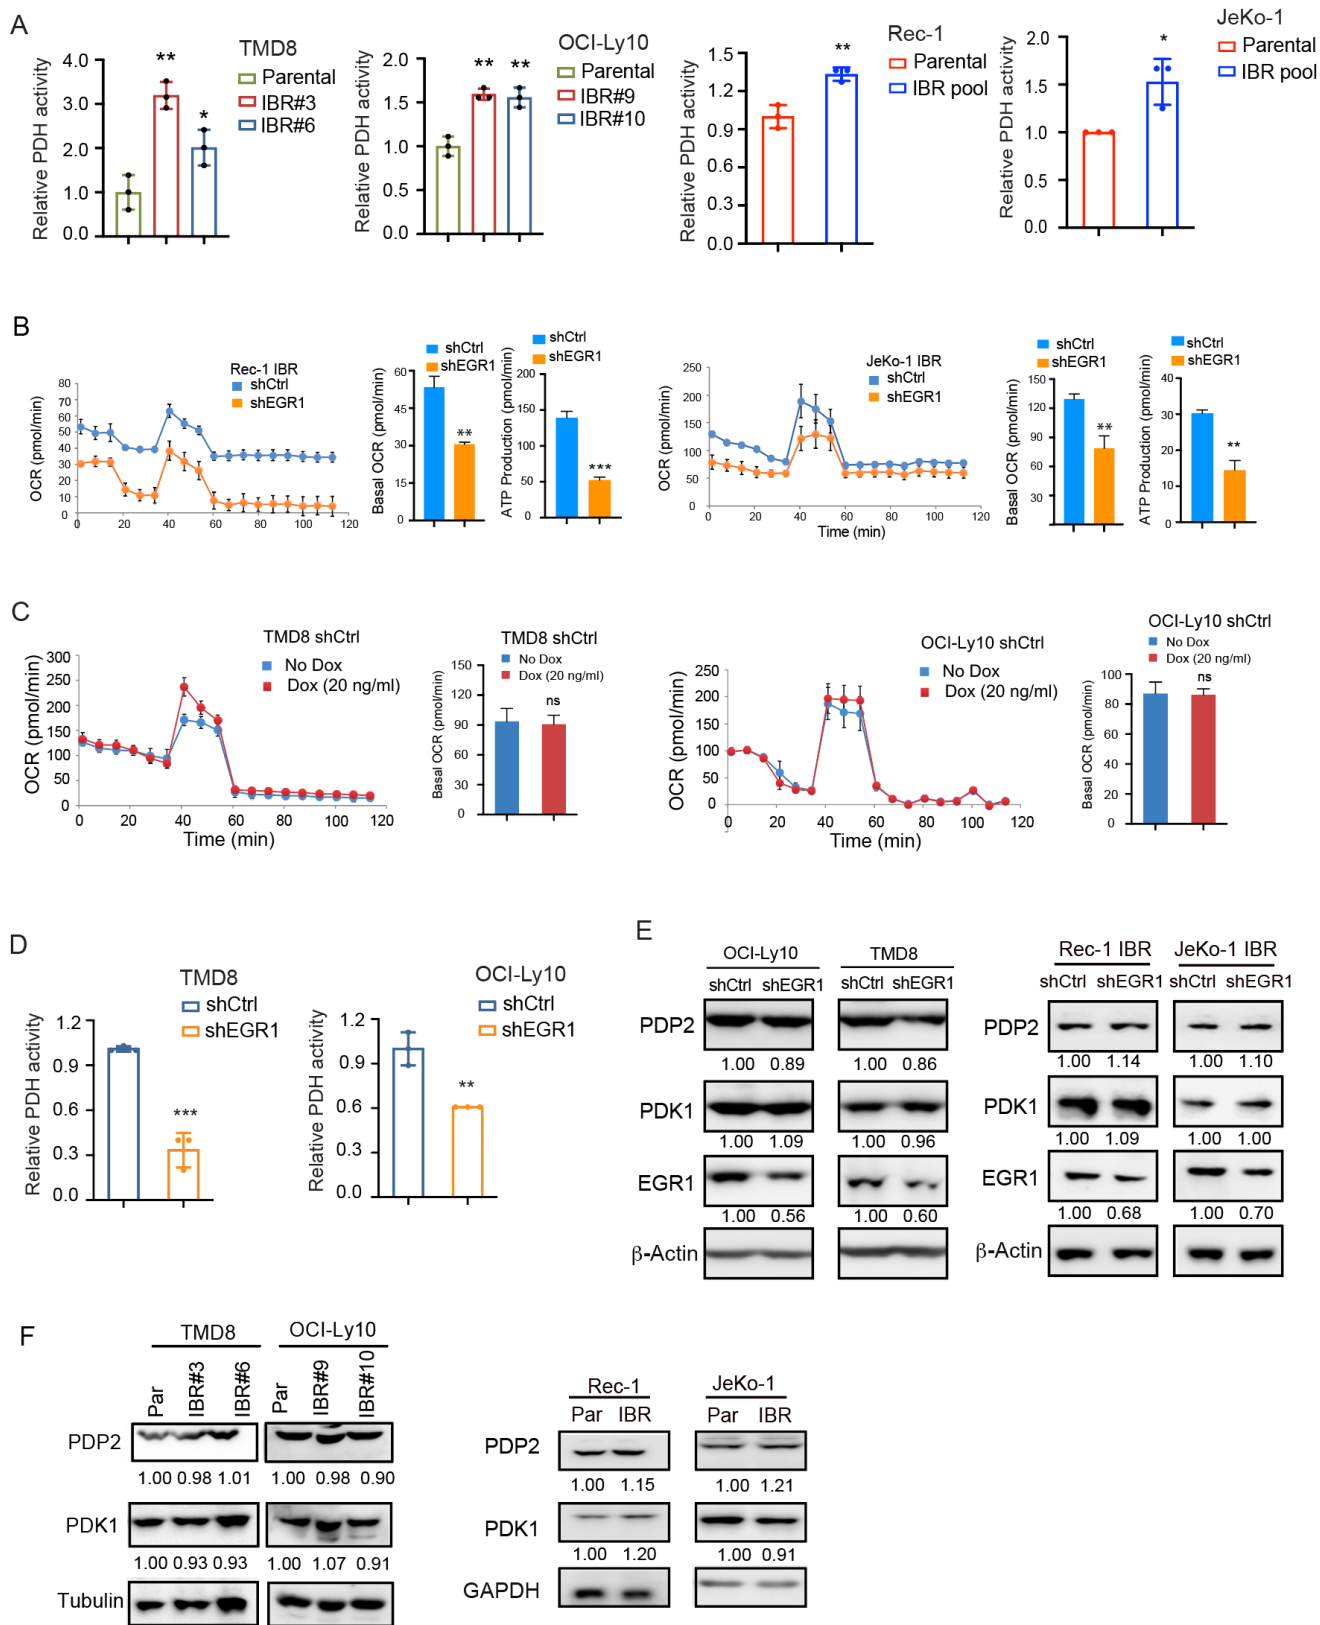

Figure S5

**Supplemental Figure 5. Analyses of PDH activity and OCR in ibrutinib-resistant cells or cells after EGR1 knockdown.** (A) PDH activity assays in ABC DLBCL TMD8 and OCI-Ly10 parental cells and indicated clones, Rec-1 and JeKo-1 parental and resistant cells. Error bars represent mean  $\pm$  SD of three replicates (\*\* $p < 0.01$ , \* $p < 0.05$ ). (B) Reduced basal OCR and ATP production after EGR1 knockdown in ibrutinib-resistant MCL cells. Error bars represent mean  $\pm$  SD of three replicates (\*\* $p < 0.01$ , \*\*\* $p < 0.001$ ). (C) OCR assay were performed in TMD8 and OCI-Ly10 control shRNA (shCtrl) cells with or without 20 ng/ml doxycycline treatment. Error bars represent mean  $\pm$  SD of three replicates. (D) PDH activity assay after EGR1 knockdown in ABC DLBCL cells. Error bars represent mean  $\pm$  SD of three replicates (\*\* $p < 0.01$ , \*\*\* $p < 0.001$ ). (E) Immunoblot analysis of PDP2 and PDK1 expression after EGR1 knockdown in ABC DLBCL and MCL cells.  $\beta$ -Actin served as a loading control. (F) Immunoblot analysis of PDP2 and PDK1 expression in IBR clones versus parental cells in ABC DLBCL cells, MCL parental and resistant cells. Tubulin and GAPDH served as a loading control.



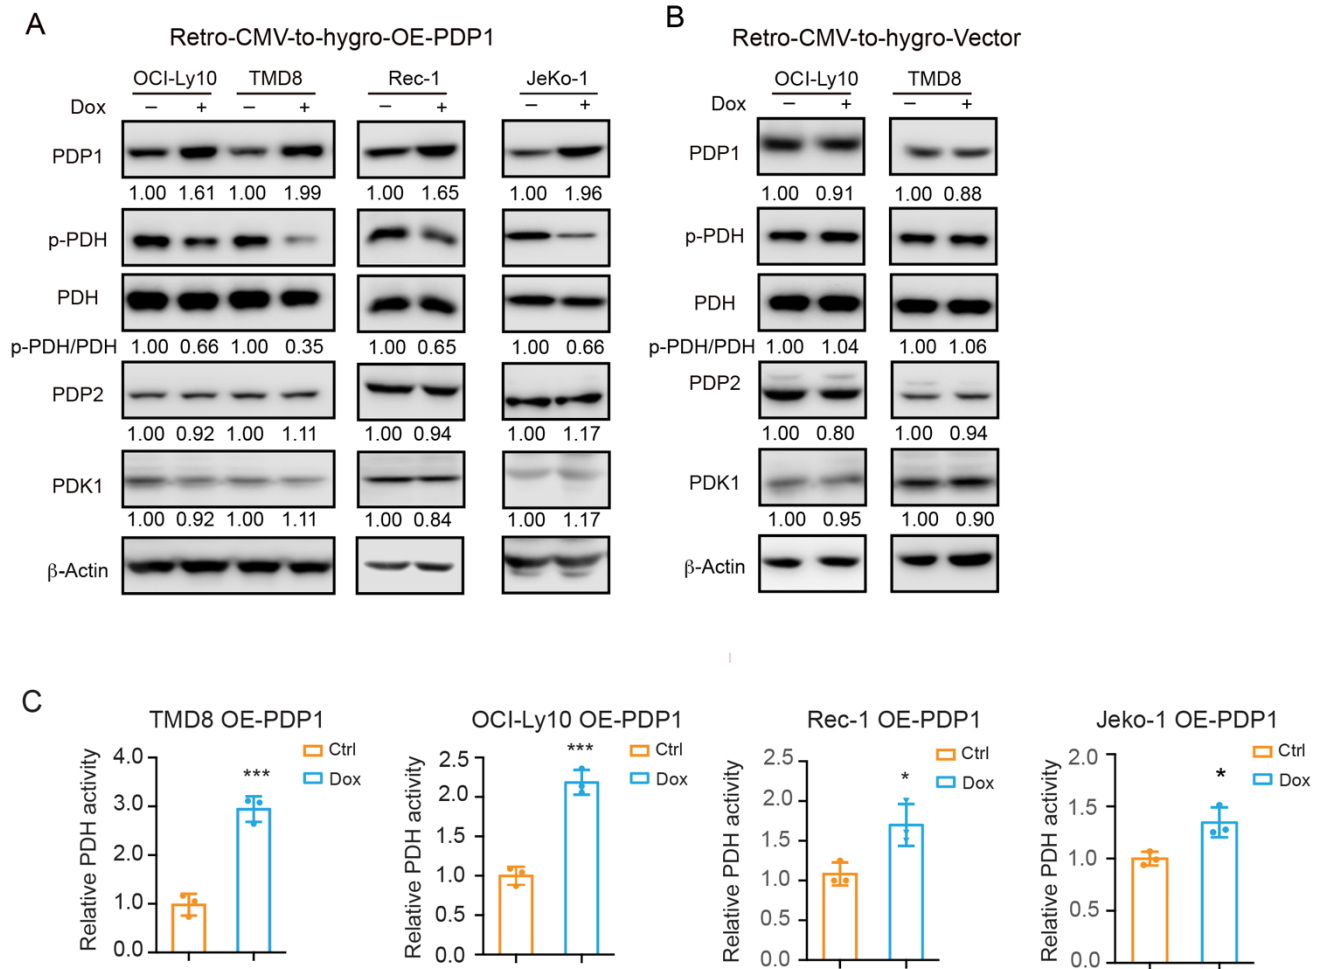

Figure S6

**Supplemental Figure 6. PDP1 overexpression increases PDH activity in ABC DLBCL and MCL cells.** (A) Immunoblot analysis of PDP1, p-PDH, PDH, PDP2 and PDK1 expression after retrovirally inducible PDP1 expression in ABC DLBCL and MCL cells treated with 20 ng/ml doxycycline for 3 days. β-Actin served as a loading control. (B) Immunoblot analysis of PDP1, p-PDH, PDH, PDP2 and PDK1 expression after retrovirally inducible empty vector in ABC DLBCL cells. β-Actin served as a loading control. (C) PDH activity assay after retrovirally inducible PDP1 expression in ABC DLBCL and MCL cells treated with 20 ng/ml doxycycline for 3 days. Error bars represent mean ± SD of three replicates (\*p<0.05, \*\*\*p<0.001).

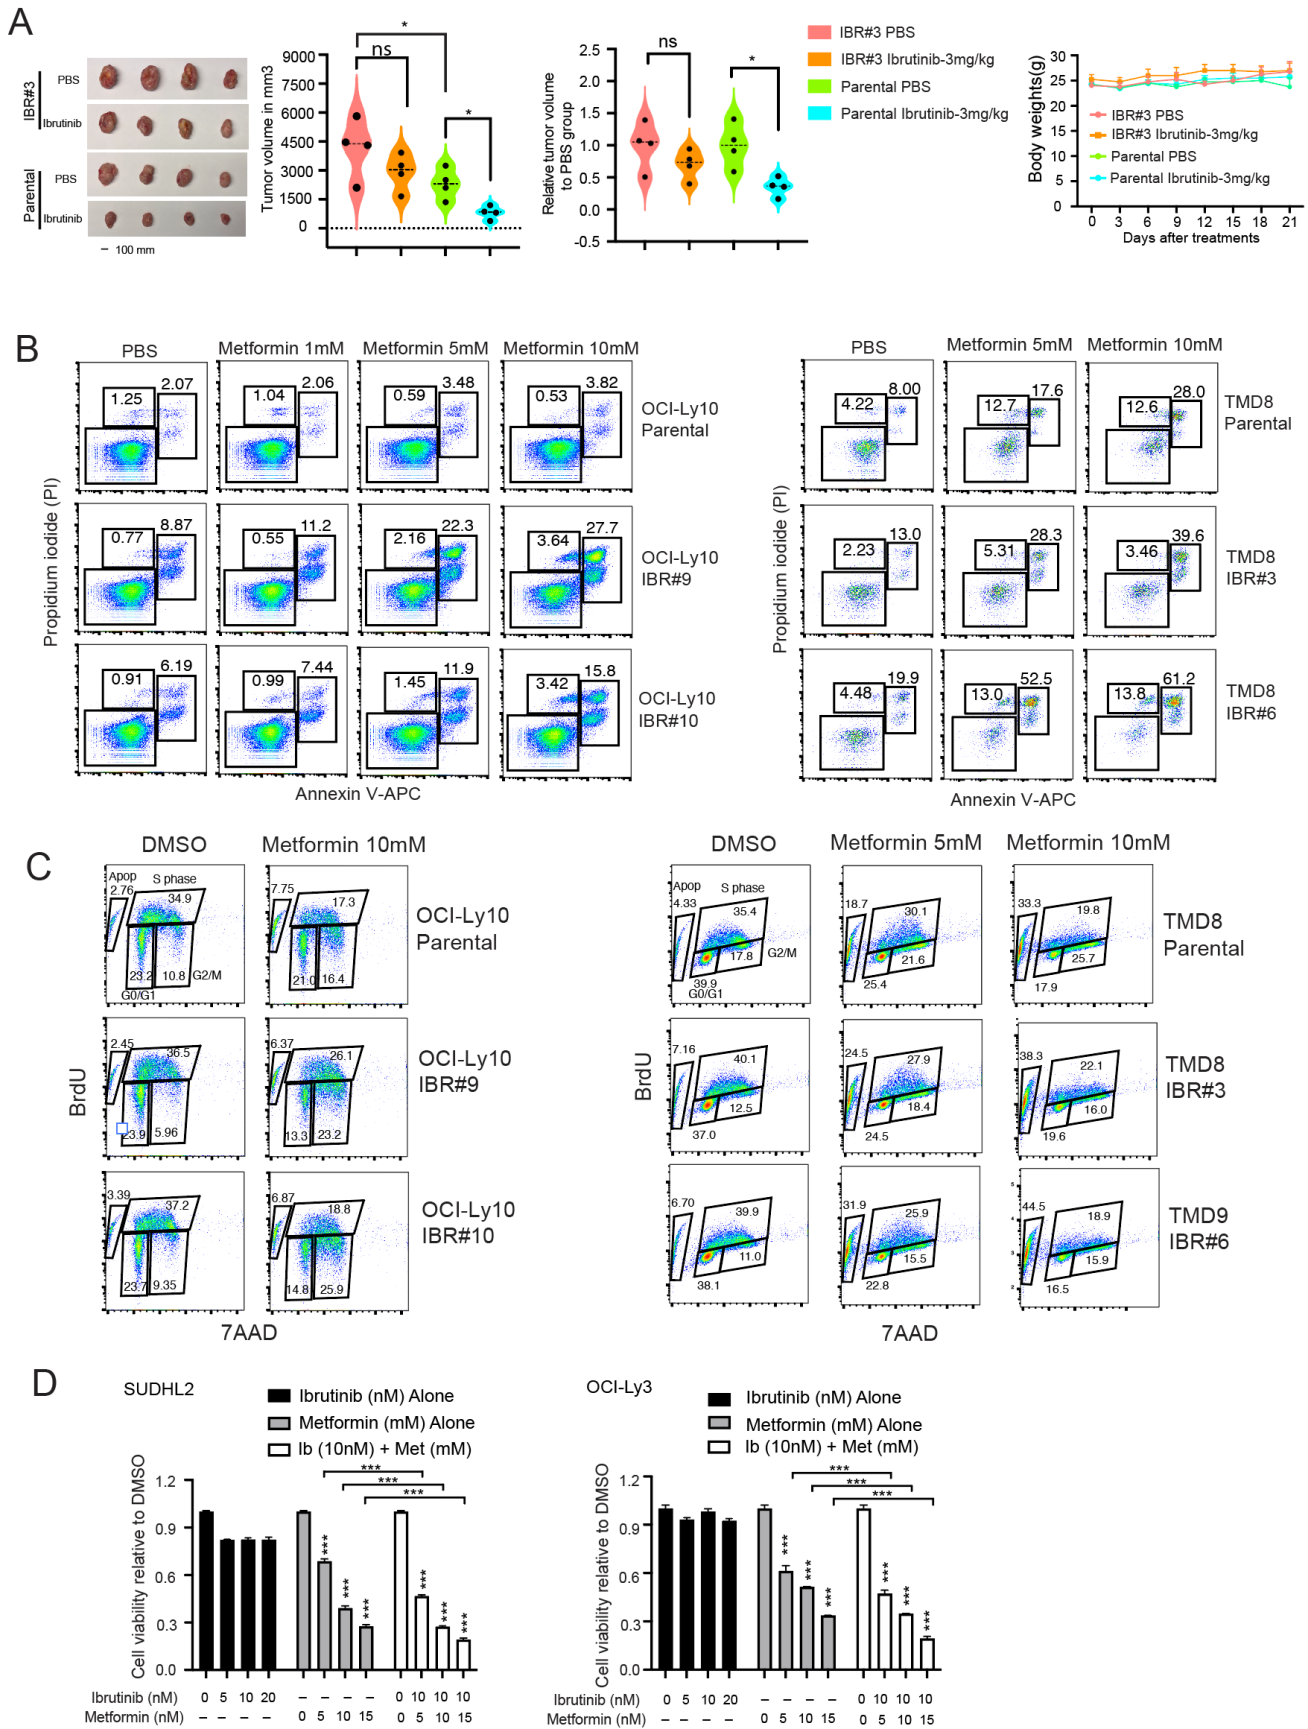

Figure S7

**Supplemental Figure 7. Xenograft analysis of ibrutinib-resistant cells and their parental cells upon ibrutinib treatment, and cell cycle and apoptosis analyses in ibrutinib-resistant cells and their parental cells upon metformin treatment.** (A) TMD8 parental and ibrutinib-resistant xenografts. TMD8 parental and ibrutinib-resistant cells were established as a subcutaneous tumor (average 150 mm<sup>3</sup>) in NSG mice, and then treated with 3 mg/kg ibrutinib (i.p.) daily until the endpoint (day 21). Tumor images and tumor volume of all four groups at the endpoint in the left two panels, relative tumor volume of ibrutinib treatments versus control groups in TMD8 ibrutinib resistant and parental cells in the middle panel, body weight changes during the treatment in each group in the right panel. Data are represented as mean ± SEM. Error bars represent mean ± SEM (One-way ANOVA, \*p<0.05). (B) Flow cytometric analysis of cell apoptosis by Annexin V and propidium iodide (PI) staining in OCI-Ly10 and TMD8 parental and resistant cells after 3-day treatment with the indicated concentrations of metformin. (C) Cell cycle analysis by flow cytometry after 4 hours of BrdU incorporation in TMD8 and OCI-Ly10 parental and resistant cells after 3-day treatment with the indicated concentrations of metformin. (D) CellTiter-Glo™ Luminescent Cell Viability Assay of primary ibrutinib-resistant SUDHL2 or OCI-Ly3 cells after 3 days of treatment with ibrutinib, metformin or a combination of the two drugs. Error bars represent mean ± SD (One-way ANOVA, \*\*\*p<0.001, n=3).

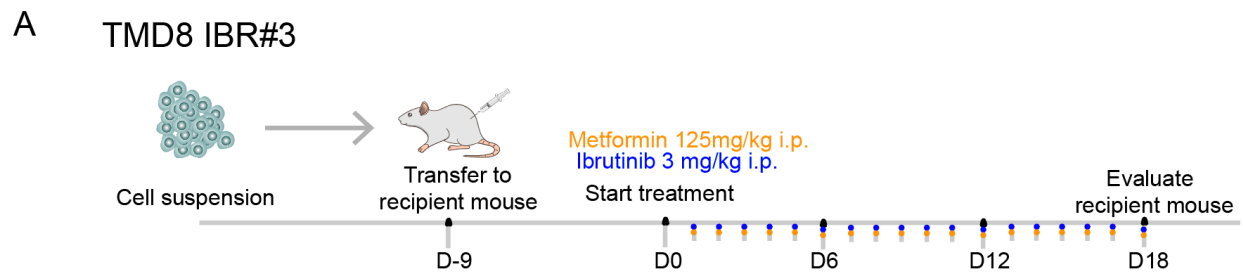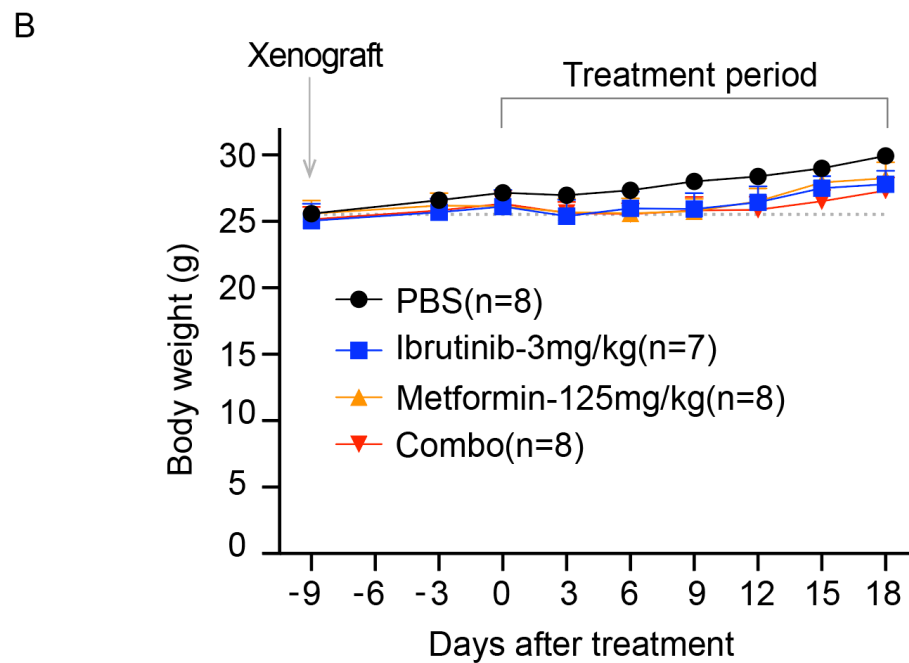

Figure S8

**Supplemental Figure 8. Schematic illustration of ibrutinib-resistant ABC DLBCL xenografts.**

(A) Schematic illustration of ibrutinib-resistant ABC DLBCL xenografts and the treatment procedure.  
 (B) Body weight changes during the treatment in each group. Data are represented as mean  $\pm$  SEM.

A

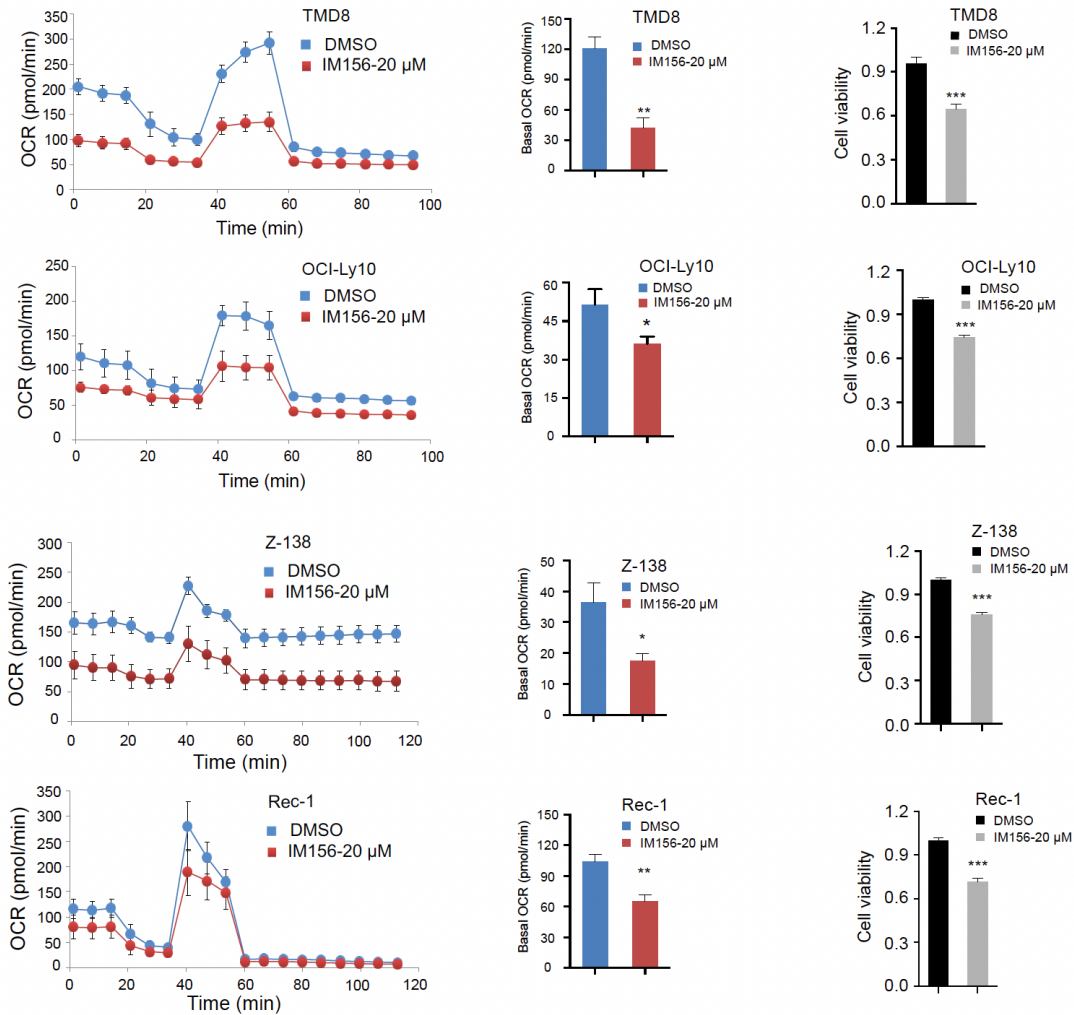

B Synergy scores

| Samples            | Drug Combination | Synergy score | Most synergistic area score | Method |
|--------------------|------------------|---------------|-----------------------------|--------|
| SUDHL-2            | Ibru-IM156       | 21.309        | 31.924                      | HSA    |
| OCI-Ly10<br>IBR#10 | Ibru-IM156       | 19.302        | 22.643                      | HSA    |
| OCI-Ly10           | Ibru-IM156       | 10.17         | 11.733                      | HSA    |
| TMD8               | Ibru-IM156       | 25.972        | 33.891                      | HSA    |

Synergy scores

| Samples | Drug Combination | Synergy score | Most synergistic area score | Method |
|---------|------------------|---------------|-----------------------------|--------|
| MCL-4   | Ibru-IM156       | 19.807        | 22.287                      | HSA    |
| MCL-5   | Ibru-IM156       | 24.885        | 30.158                      | HSA    |
| MCL-7   | Ibru-IM156       | 16.114        | 19.669                      | HSA    |
| MCL-9   | Ibru-IM156       | 8.246         | 11.473                      | HSA    |

Synergy scores

| Samples    | Drug Combination | Synergy score | Most synergistic area score | Method |
|------------|------------------|---------------|-----------------------------|--------|
| Granta-519 | Ibru-IM156       | 16.513        | 33.131                      | HSA    |
| Z-138      | Ibru-IM156       | 8.079         | 14.229                      | HSA    |
| Mino       | Ibru-IM156       | 11.047        | 15.82                       | HSA    |
| Rec-1      | Ibru-IM156       | 18.852        | 32.454                      | HSA    |
| JeKo       | Ibru-IM156       | 14.319        | 22.518                      | HSA    |

Figure S9

**Supplemental Figure 9. OCR analysis after IM156 treatment and synergy scores in ABC DLBCL and MCL cell lines and primary MCL cells after IM156 and ibrutinib treatment. (A) OCRs were**

determined by Seahorse XFe96 extracellular flux analyzer (Left panel). Reduced basal OCR after 3-days treatment with IM156 (20  $\mu$ M) in ABC DLBCL and MCL cells (Middle panel). Cell viability was determined by trypan blue staining after 3-day treatment with IM156 (20  $\mu$ M) (Right panel). Error bars represent mean  $\pm$  SD (\* $p$ <0.05, \*\* $p$ <0.01. \*\*\* $p$ <0.001,  $n$ =3). (B) Synergy scores were calculated by online SynergyFinder 2.0 (<https://synergyfinder.fimm.fi/synergy/20201021224844908442/>) based on the HSA model. A score above 0 indicated a synergistic effect of the two drugs.
